# Supplementary material for: Nightmares as predictors of suicide: an extension study including war veterans
Source: PubMed Central journal article supplement (PMC5353666; doi:10.1038/srep44756), 2017-03-15
Supplement: srep44756-s1.pdf [file srep44756-s1.pdf]

# Nightmares as predictors of suicide: an extension study including war veterans

---

Nils Sandman, Katja Valli, Erkki Kronholm, Erkki Vartiainen, Tiina Laatikainen & Tiina Paunio

---

## *Supplemental material*

### **Contents**

|                                                                              |          |
|------------------------------------------------------------------------------|----------|
| <b>TABLE S1. Association between nightmares and covariates.....</b>          | <b>2</b> |
| <b>TABLE S2. Nightmares as predictors for suicide .....</b>                  | <b>3</b> |
| <b>TABLE S3. Nightmares as predictors for suicide, Model 3.....</b>          | <b>5</b> |
| <b>TABLE S4. Nightmares as predictors of suicide among war veterans.....</b> | <b>6</b> |
| <b>TABLE S5. Risk factors of nightmares among war veterans.....</b>          | <b>7</b> |

**TABLE S1. Association between nightmares and covariates**

|                                | <b>Often</b> | <b>Nightmares<br/>Sometimes</b> | <b>Never</b> | <b>N</b>       | <b>Cramer V</b> | <b><math>\chi^2</math></b> |
|--------------------------------|--------------|---------------------------------|--------------|----------------|-----------------|----------------------------|
| <b>Gender</b>                  |              |                                 |              | 69 101         | 0.094           | <0.0001                    |
| Women                          | 4.8%         | 43.8%                           | 51.4%        | 35 621 (51.6%) |                 |                            |
| Men                            | 3.4%         | 35.9%                           | 60.7%        | 33 480 (48.4%) |                 |                            |
| <b>In relationship</b>         |              |                                 |              | 63 585         | 0.027           | <0.0001                    |
| Yes                            | 3.9%         | 39.3%                           | 56.8%        | 47 828 (75%)   |                 |                            |
| No                             | 4.9%         | 40.6%                           | 54.5%        | 15 757 (25%)   |                 |                            |
| <b>Employed</b>                |              |                                 |              | 67 284         | 0.115           | <0.0001                    |
| Yes                            | 3.0%         | 38.1%                           | 59.0%        | 46 974 (30.6%) |                 |                            |
| No                             | 6.7%         | 44.4%                           | 48.9%        | 20 310 (69.4%) |                 |                            |
| <b>Smoking</b>                 |              |                                 |              | 63 072         | 0.032           | <0.0001                    |
| Yes                            | 4.9%         | 41.0%                           | 54.1%        | 17 239 (27.1%) |                 |                            |
| No                             | 3.8%         | 39.1%                           | 57.1%        | 45 833 (72.9%) |                 |                            |
| <b>Alcohol use</b>             |              |                                 |              | 63 409         | 0.045           | <0.0001                    |
| Several times a week           | 9.3%         | 47.1%                           | 43.6%        | 1376 (2.2%)    |                 |                            |
| Occasionally                   | 3.7%         | 41.1%                           | 55.2%        | 42 549 (66.7%) |                 |                            |
| Not at all                     | 4.4%         | 36.9%                           | 58.7%        | 19 484 (31.1%) |                 |                            |
| <b>Physical exercise</b>       |              |                                 |              | 66 996         | 0.037           | <0.0001                    |
| Weekly or more often           | 3.5%         | 40.4%                           | 56.1%        | 44 424 (66.2%) |                 |                            |
| Seldom                         | 5.1%         | 39.2%                           | 55.8%        | 22 572 (33.8%) |                 |                            |
| <b>Insomnia</b>                |              |                                 |              | 68 607         | 0.251           | <0.0001                    |
| Often                          | 19.1%        | 4.9%                            | 1.5%         | 5312 (7.9%)    |                 |                            |
| Sometimes                      | 53.3%        | 53.5%                           | 30.1%        | 23 396 (34.3%) |                 |                            |
| Never                          | 27.6%        | 41.6%                           | 68.4%        | 39 899 (57.8%) |                 |                            |
| <b>Symptoms of depression</b>  |              |                                 |              | 63 150         | 0.285           | <0.0001                    |
| Yes                            | 25.2%        | 52.9%                           | 21.9%        | 3588 (5.8%)    |                 |                            |
| No                             | 2.8%         | 38.6%                           | 58.5%        | 59 562 (94.2%) |                 |                            |
| <b>Psychotropic medication</b> |              |                                 |              | 69 101         | 0.195           | <0.0001                    |
| Yes                            | 12.3%        | 52.1%                           | 35.6%        | 8453 (12.2%)   |                 |                            |
| No                             | 3.0%         | 38.3%                           | 58.7%        | 60 648 (87.8%) |                 |                            |

**TABLE S2. Nightmares as predictors for suicide**

Cox regression model.

|                      | <b>Hazard Ratio</b> | <b>95% CI</b> | <b>P</b> | <b>Suicides</b> | <b>N</b> |
|----------------------|---------------------|---------------|----------|-----------------|----------|
| <b>Model 1</b>       |                     |               |          | 382             | 68 646   |
| NM often             | 2.63                | 1.80 – 3.83   | <0.001   |                 |          |
| NM sometimes         | 1.49                | 1.21 – 1.83   | <0.001   |                 |          |
| NM never             | 1                   |               |          |                 |          |
| <b>Model 2</b>       |                     |               |          | 382             | 68 646   |
| NM often             | 3.50                | 2.93 – 5.12   | <0.001   |                 |          |
| NM sometimes         | 1.71                | 1.39 – 2.11   | <0.001   |                 |          |
| NM never             | 1                   |               |          |                 |          |
| <b>Model 3</b>       |                     |               |          | 332             | 54 815   |
| NM often             | 1.84                | 1.15 – 2.93   | 0.010    |                 |          |
| NM sometimes         | 1.33                | 1.05 – 1.69   | 0.018    |                 |          |
| NM never             | 1                   |               |          |                 |          |
| <b>Model 4 women</b> |                     |               |          | 78              | 27 726   |
| NM often             | 1.93                | 0.90 – 4.12   | 0.091    |                 |          |
| NM sometimes         | 0.89                | 0.53 – 1.47   | 0.64     |                 |          |
| NM never             | 1                   |               |          |                 |          |
| <b>Model 4 men</b>   |                     |               |          | 254             | 27 064   |
| NM often             | 1.56                | 0.86 – 2.89   | 0.143    |                 |          |
| NM sometimes         | 1.48                | 1.13 – 1.96   | 0.004    |                 |          |
| NM never             | 1                   |               |          |                 |          |
| <b>Model 5</b>       |                     |               |          | 306             | 67 761   |
| NM often             | 2.00                | 1.22 – 3.28   | 0.006    |                 |          |
| NM sometimes         | 1.37                | 1.07 – 1.75   | 0.013    |                 |          |
| NM never             | 1                   |               |          |                 |          |
| <b>Model 5 men</b>   |                     |               |          | 229             | 31 222   |
| NM often             | 1.72                | 0.87 – 3.38   | 0.118    |                 |          |
| NM sometimes         | 1.54                | 1.16 – 2.04   | 0.003    |                 |          |
| NM never             | 1                   |               |          |                 |          |
| <b>Model 6</b>       |                     |               |          | 281             | 59 854   |
| NM often             | 2.01                | 1.19 – 3.41   | 0.009    |                 |          |
| NM sometimes         | 1.38                | 1.07 – 1.79   | 0.013    |                 |          |
| NM never             | 1                   |               |          |                 |          |

NM = Nightmares

Reference category for nightmares is “no nightmares during the last 30 days”

**Model 1:** Unadjusted.

**Model 2:** Adjusted with sex and age.

**Model 3:** Adjusted with sex, age, relationship status, employment status, smoking, use of alcohol, amount of exercise, symptoms of insomnia, symptoms of depression and use of psychotropic medication.

**Model 4:** Men and women separately. Adjusted with age, relationship status, employment status, smoking, use of alcohol, amount of exercise, symptoms of insomnia, symptoms of depression and use of psychotropic medication.

**Model 5:** Known war veterans excluded. Adjusted with sex, age, relationship status, employment status, smoking, use of alcohol, amount of exercise, symptoms of insomnia, symptoms of depression and use of psychotropic medication.

**Model 5 men:** Men only, known war veterans excluded. Adjusted with age, relationship status, employment status, smoking, use of alcohol, amount of exercise, symptoms of insomnia, symptoms of depression and use of psychotropic medication.

**Model 6:** All participants born before 1927 excluded – data does not include any war veterans. Adjusted with sex, age, relationship status, employment status, smoking, use of alcohol, amount of exercise, symptoms of insomnia, symptoms of depression and use of psychotropic medication.

**TABLE S3. Nightmares as predictors for suicide, Model 3.**

Cox regression model with all co-variants displayed.

| <b>RISK OF SUICIDE: WHOLE SAMPLE, N = 54815</b> |                     |               |          |          |
|-------------------------------------------------|---------------------|---------------|----------|----------|
|                                                 | <b>Hazard Ratio</b> | <b>95% CI</b> | <b>P</b> | <b>N</b> |
| <b>Nightmares</b>                               |                     |               |          |          |
| Often                                           | 1.84                | 1.15 – 2.93   | 0.010    | 2174     |
| Occasionally                                    | 1.33                | 1.05 – 1.69   | 0.018    | 21774    |
| Not at all                                      | 1                   |               |          | 31252    |
| <b>Insomnia</b>                                 |                     |               |          |          |
| Often                                           | 1.42                | 0.94 – 2.16   | 0.097    | 4014     |
| Occasionally                                    | 1.30                | 1.01 – 1.67   | 0.041    | 18188    |
| Not at all                                      | 1                   |               |          | 32613    |
| <b>Gender</b>                                   |                     |               |          |          |
| Male                                            | 3.52                | 2.68 – 4.61   | <0.001   | 27089    |
| Female                                          | 1                   |               |          | 27726    |
| <b>Relationship status</b>                      |                     |               |          |          |
| Not in relationship                             | 1.31                | 1.03 – 1.66   | 0.027    | 13183    |
| In relationship                                 | 1                   |               |          | 41632    |
| <b>Employment</b>                               |                     |               |          |          |
| Unemployed                                      | 1.36                | 1.03 – 1.79   | 0.030    | 14994    |
| Employed                                        | 1                   |               |          | 39821    |
| <b>Smoking</b>                                  |                     |               |          |          |
| Smokes                                          | 1.96                | 1.57 – 2.50   | <0.001   | 15677    |
| Does not smoke                                  | 1                   |               |          | 39138    |
| <b>Alcohol use</b>                              |                     |               |          |          |
| Heavy                                           | 1.24                | 0.73 – 2.13   | 0.426    | 1196     |
| Moderate                                        | 0.98                | 0.74 – 1.31   | 0.907    | 36992    |
| None                                            | 1                   |               |          | 16627    |
| <b>Exercise</b>                                 |                     |               |          |          |
| Regular                                         | 1.23                | 0.99 – 1.54   | 0.61     | 35839    |
| Seldom                                          |                     |               |          | 18976    |
| <b>Depression</b>                               |                     |               |          |          |
| Symptoms of depression                          | 0.95                | 0.62 – 1.44   | 0.801    | 3002     |
| No symptoms of depression                       | 1                   |               |          | 51813    |
| <b>Psychotropic medication</b>                  |                     |               |          |          |
| Yes                                             | 1.91                | 1.38 – 2.63   | <0.001   | 6482     |
| No                                              | 1                   |               |          | 48333    |

**TABLE S4. Nightmares as predictors of suicide among war veterans**

Cox regression model, men of surveys in 1972 and 1977 only.

|                 | <b>Hazard Ratio</b> | <b>95% CI</b> | <b>P</b> | <b>N of suicides</b> | <b>Total N</b> |
|-----------------|---------------------|---------------|----------|----------------------|----------------|
| <b>Model 1</b>  |                     |               |          | 165                  | 10 908         |
| NM Often        | 1.96                | 0.94 – 4.07   | 0.072    |                      |                |
| NM Occasionally | 1.79                | 1.31 – 2.45   | <0.001   |                      |                |
| War veteran     | 1.25                | 0.83 – 1.86   | 0.285    |                      |                |
| <b>Model 2</b>  |                     |               |          | 165                  | 10 908         |
| NM Often        | 1.96                | 0.94 – 4.08   | 0.071    |                      |                |
| NM Occasionally | 1.79                | 1.31 – 2.45   | <0.001   |                      |                |
| War veteran     | 1.22                | 0.71 – 2.09   | 0.480    |                      |                |
| <b>Model 3</b>  |                     |               |          | 144                  | 9815           |
| NM Often        | 1.51                | 0.68 – 3.36   | 0.308    |                      |                |
| NM Occasionally | 1.51                | 1.06 – 2.15   | 0.024    |                      |                |
| War veteran     | 1.37                | 0.77 – 2.45   | 0.282    |                      |                |

NM = Nightmares

Reference category for nightmares is “no nightmares during the last 30 days” and for war veterans “no service at the front during WWII”

**Model 1:** Adjusted with war experiences.

**Model 2:** Adjusted with war experiences and age.

**Model 3:** Adjusted with , war experiences, age, relationship status, employment status, smoking, use of alcohol, amount of exercise, symptoms of insomnia, symptoms of depression and use of psychotropic medication.

**TABLE S5. Risk factors of nightmares among war veterans**

Multinomial logistic regression model of risk factors for nightmares among war veterans.

| Variable                            |                      | Frequent nightmares |              |        | Occasional nightmares |             |        |
|-------------------------------------|----------------------|---------------------|--------------|--------|-----------------------|-------------|--------|
|                                     |                      | OR                  | OR 95% CI    | p      | OR                    | OR 95% CI   | p      |
| <b>Symptoms of insomnia</b>         | Often                | 14.78               | 9.56 – 22.85 | <0.001 | 3.38                  | 2.51 – 4.54 | <0.001 |
|                                     | Sometimes            | 3.31                | 2.25 – 4.86  | <0.001 | 2.49                  | 2.01 – 2.95 | <0.001 |
|                                     | Never                | 1                   |              |        | 1                     |             |        |
| <b>Symptoms of depression</b>       | Yes                  | 5.70                | 3.70 – 8.79  | <0.001 | 2.28                  | 1.61 – 3.22 | <0.001 |
|                                     | No                   | 1                   |              |        | 1                     |             |        |
| <b>Spirits several times a week</b> | Yes                  | 2.56                | 1.29 – 5.21  | 0.008  | 1.96                  | 1.26 – 3.04 | 0.003  |
|                                     | Spirits less often   | 1.50                | 0.97 – 2.31  | 0.067  | 1.60                  | 1.28 – 1.99 | <0.001 |
|                                     | Does not use alcohol | 1                   |              |        | 1                     |             |        |
| <b>Wounded during the war</b>       | Yes, war invalid     | 1.65                | 1.06 – 2.55  | 0.026  | 1.31                  | 1.02 – 1.68 | 0.032  |
|                                     | Yes, full recovery   | 0.97                | 0.68 – 1.39  | 0.872  | 1.14                  | 0.95 – 1.36 | 0.163  |
|                                     | No                   | 1                   |              |        | 1                     |             |        |

Reference category for nightmares is “no nightmares during the last 30 days”
